# Supplementary material for: Outcome Improvement Between the First Two Waves of the Coronavirus Disease 2019 Pandemic in a Single Tertiary-Care Hospital in Belgium
Source: PubMed Central journal article supplement — Crit Care Explor. 2021 May 19;3(5):e0438. doi: 10.1097/CCE.0000000000000438 (PMC8162523; doi:10.1097/cce.0000000000000438), 2021-05-19
Supplement: cc9-3-e0438-s001.pdf [file cc9-3-e0438-s001.pdf]

Supplemental digital content.

Table 1: Characteristics of transferred and non-transferred patients on intensive care unit admission during the second wave of the Covid-19 pandemic.

| Variable                                              | Non-Transferred  |     | Transferred      |    | p Value |
|-------------------------------------------------------|------------------|-----|------------------|----|---------|
|                                                       | Median (Q1-Q3)   | n   | Median (Q1-Q3)   | n  |         |
| SOFA                                                  | 4 (3-6)          | 120 | 4 (4-5)          | 28 | 0.60    |
| PaO <sub>2</sub> /FI <sub>O</sub> <sub>2</sub> (mmHg) | 91.0 (69.0-117)  | 89  | 75.9 (68.7-97.1) | 24 | 0.26    |
| Lymphocyte count (10 <sup>3</sup> /mm <sup>3</sup> )  | 0.66 (0.42-0.96) | 127 | 0.77 (0.56-1.01) | 30 | 0.38    |
| CRP (mg/L)                                            | 111.2 (63.9-197) | 127 | 120.5 (74.4-175) | 30 | 0.57    |
| D-dimer (ng/ml)                                       | 1280 (603-2043)  | 118 | 696.5 (522-1173) | 30 | 0.011   |
| Creatinine (mg/dL)                                    | 0.87 (0.70-1.23) | 127 | 0.82 (0.72-0.94) | 30 | 0.16    |
| Platelet count (10 <sup>3</sup> /mm <sup>3</sup> )    | 233 (159-305)    | 127 | 226.5 (186-282)  | 30 | 0.70    |

Variables are compared between groups using Kruskal-Wallis test.

Abbreviations: SOFA: sequential organ failure assessment; CRP: C-reactive protein
