# Supplementary material for: Outcome Improvement Between the First Two Waves of the Coronavirus Disease 2019 Pandemic in a Single Tertiary-Care Hospital in Belgium
Source: PubMed Central journal article supplement — Crit Care Explor. 2021 May 19;3(5):e0438. doi: 10.1097/CCE.0000000000000438 (PMC8162523; doi:10.1097/cce.0000000000000438), 2021-05-19

## **Legends of Supplemental Digital Content.**

### **Figure 1, Supplement Digital Content.**

#### **Title:**

Flow chart of Covid-19 patients.

#### **Legend**

Abbreviation: ICU: intensive care unit

### **Figure 2, Supplement Digital Content.**

#### **Title:**

Kaplan-Meier analysis of 30-day survival of hospitalized Covid-19 patients during the first and the second wave of pandemic.

#### **Legend:**

Abbreviations: W1: first wave of Covid-19 pandemic; W2: second wave of Covid-19 pandemic.

### **Figure 3, Supplement Digital Content.**

#### **Title:**

Kaplan-Meier analysis of 30-day survival of intensive care unit hospitalized Covid-19 patients during the first and the second wave of pandemic.

#### **Legend:**

Abbreviations: W1: first wave of Covid-19 pandemic; W2: second wave of Covid-19 pandemic.

### **Table 1, Supplement Digital content.**

Characteristics of transferred and non-transferred patients on intensive care unit admission during the second wave of the Covid-19 pandemic.

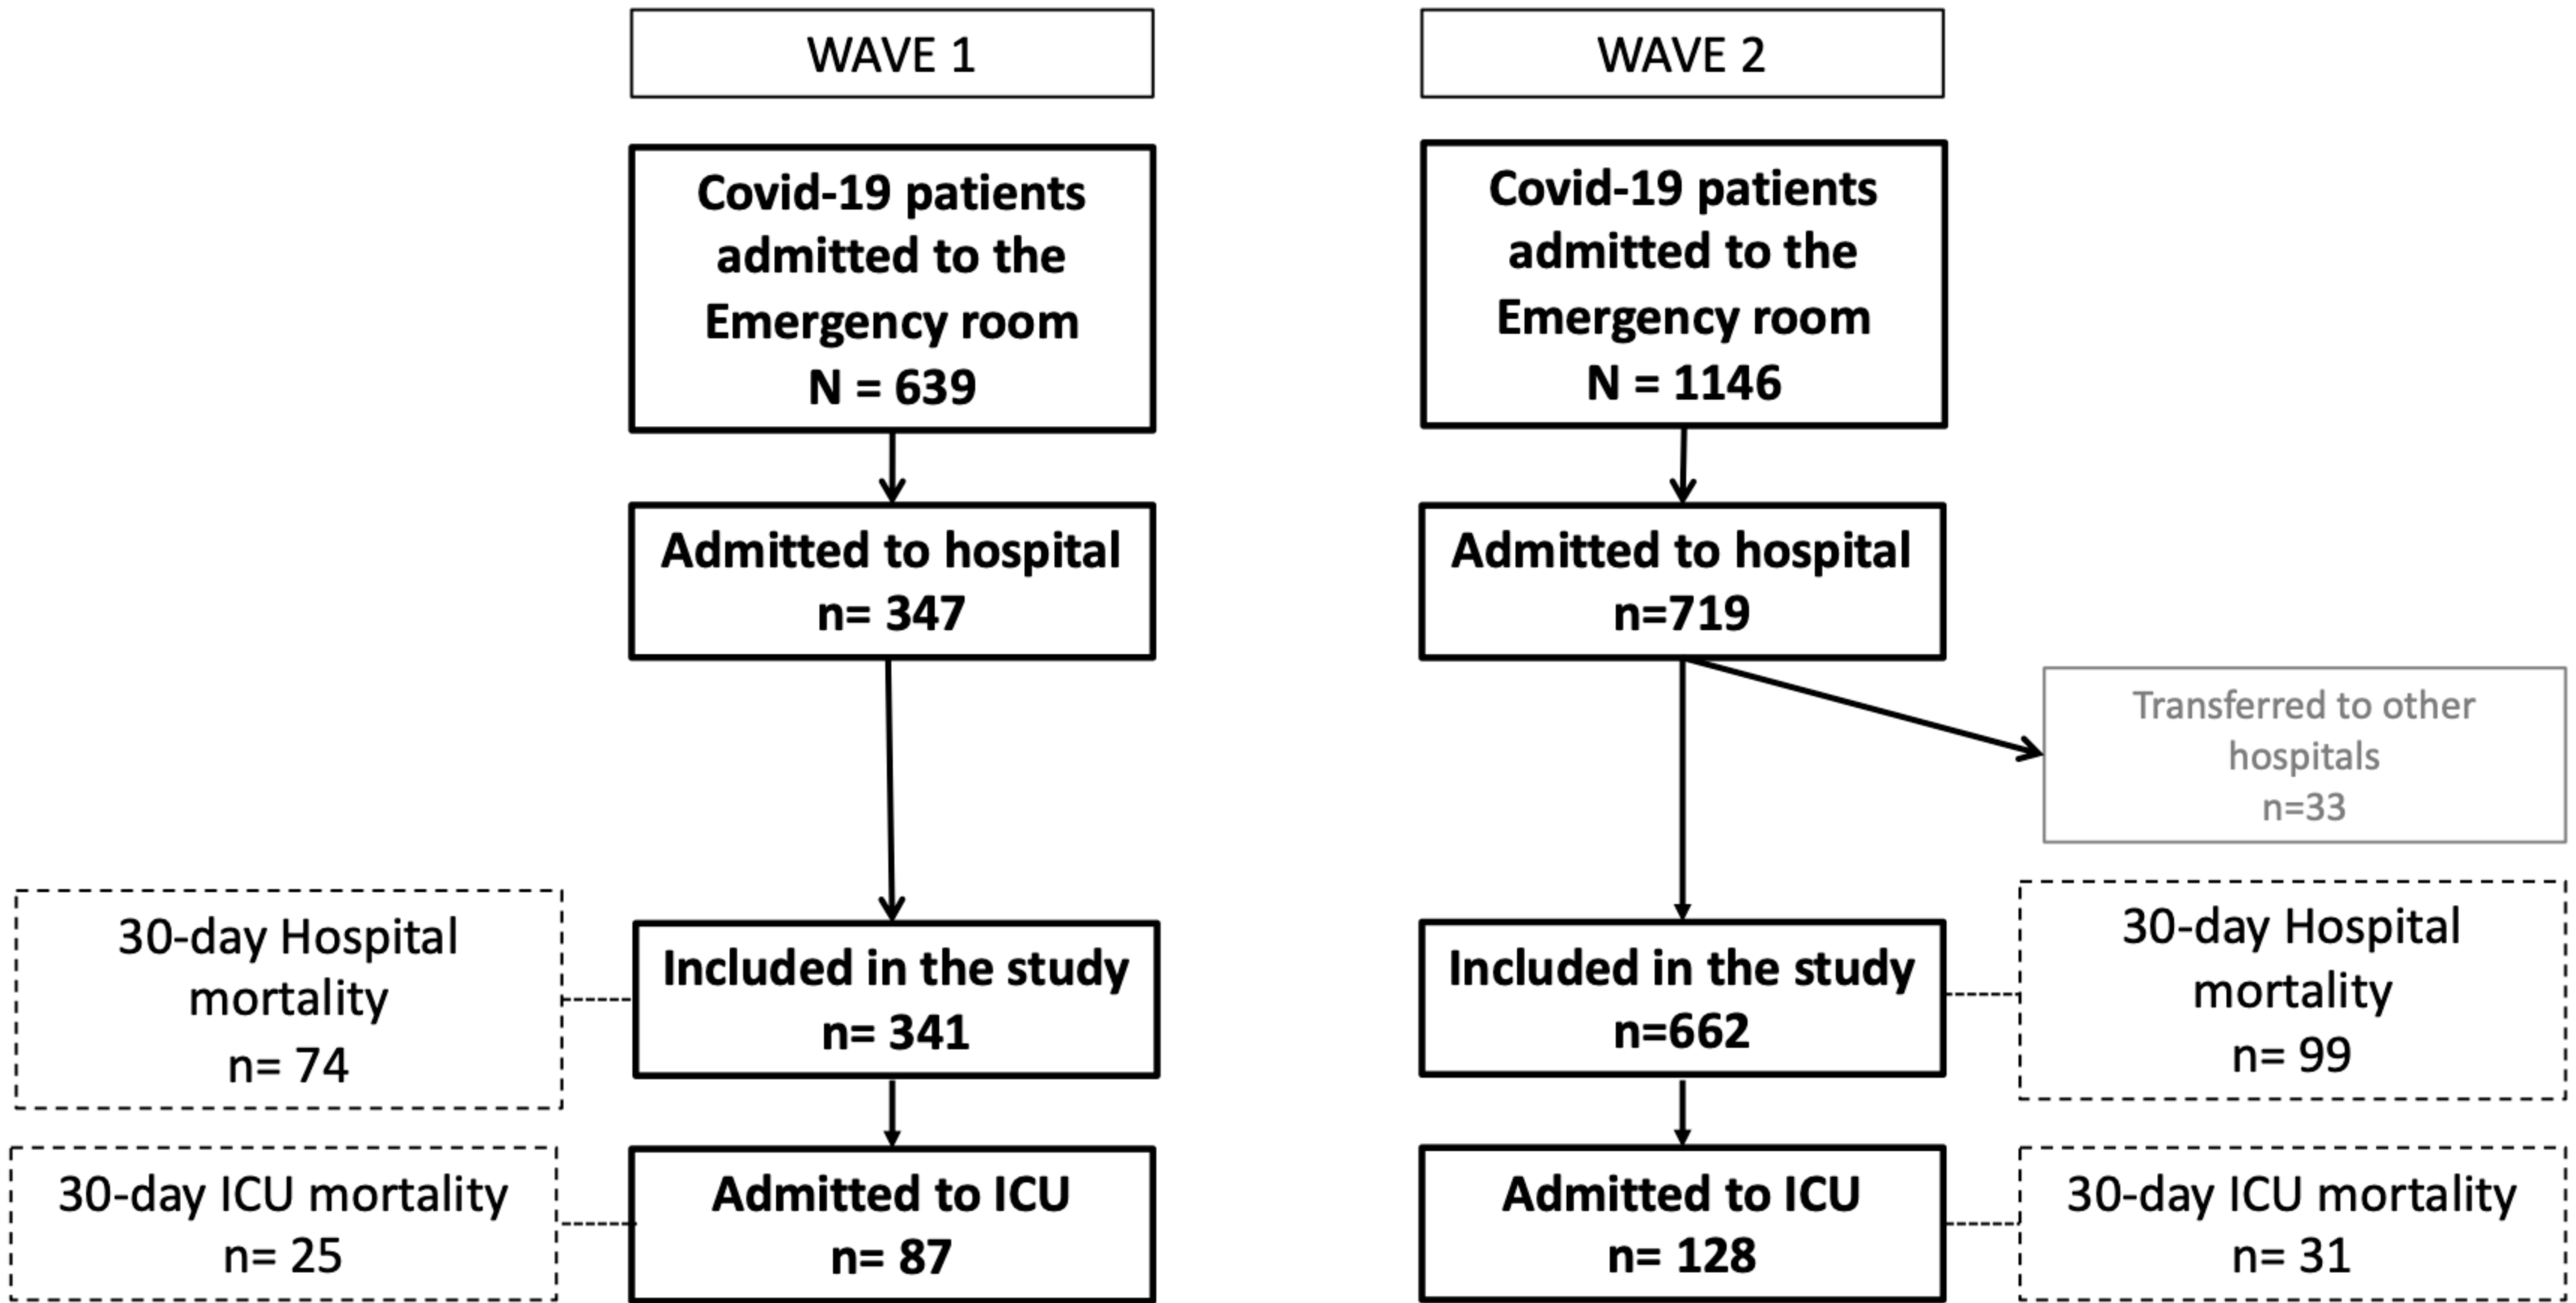

Supplement: cc9-3-e0438-s002.pdf [file cc9-3-e0438-s002.pdf]
