# Supplementary figures and images for: Outcome Improvement Between the First Two Waves of the Coronavirus Disease 2019 Pandemic in a Single Tertiary-Care Hospital in Belgium
Source: PubMed Central journal article supplement — Crit Care Explor. 2021 May 19;3(5):e0438. doi: 10.1097/CCE.0000000000000438 (PMC8162523; doi:10.1097/cce.0000000000000438), 2021-05-19

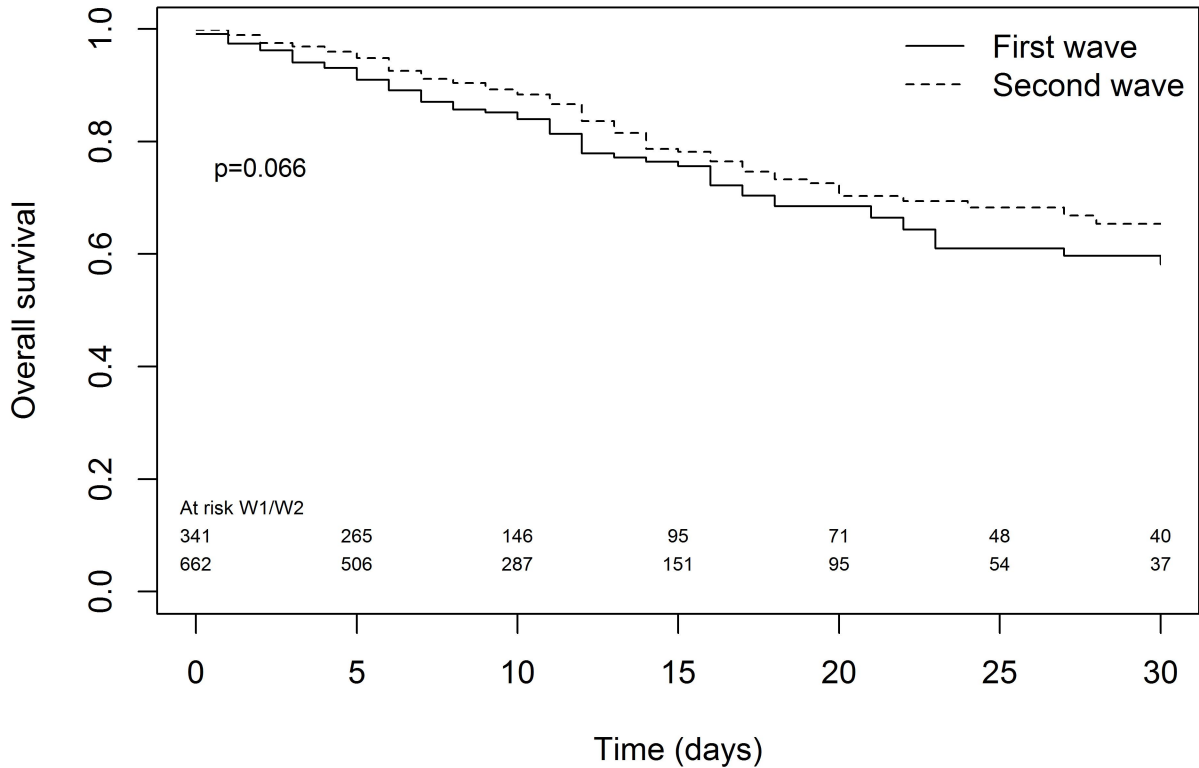

Supplement: cc9-3-e0438-s003.pdf [file cc9-3-e0438-s003.pdf]
